# Supplementary material for: Endothelial cell-derived semaphorin 3A inhibits filopodia formation by blood vascular tip cells
Source: Oxford University Press journal article supplement (doi:10.1242/dev.127670), 2016-02-15
Supplement: dev127670supp.pdf [file dev127670supp.pdf]

## Supplementary Materials and Methods

### Genotyping of *Sema3A*-cECKO mice

*Sema3A loxP* PCR was performed with extracted DNA according to the following protocol: One incubation at 94°C for 5 min, 30 cycles of denaturation at 94°C for 30 sec, an annealing step at 60°C for 30 sec, and an elongation step at 72°C for 2 min, followed by a last amplification step at 72°C for 5 min with the forward primer 5'-ACAACGCTTGCCTCGGGAGGTAAA-3' and the reverse primer 5'-ATGGTTCTGATAG-GTGAGGCATGG-3'. For the VECad-Cre transgene, the following protocol was used: One incubation at 94°C for 2 min, 39 cycles of denaturation at 94°C for 20 sec, an annealing step at 56°C for 20 sec and an elongation step at 70°C for 30 sec, followed by a last amplification step at 70°C for 5 min. The following primers were used: Forward primer 5'-GCAGGCAGCTCACAAAGGAACAAT-3', the reverse primer for the VECad gene 5'-TGTCCTTGCTGAGTGACAGTGGAA-3' and the reverse primer for Cre transgene 5'-ATCACTCGTTGCATCGACCGGTAA-3'.

### Quantification of *Sema3A* mRNA levels in sorted endothelial cells

We sorted 150,000 CD45- (BD Biosciences, FITC conjugated mouse-anti-CD45.1 antibody, 553775, 1:200; BD Biosciences, FITC conjugated mouse-anti-CD45.2, 553772, 1:200) and CD31+ (BD Biosciences, APC conjugated rat-anti-CD31, 551262, 1:200) ECs from livers of P8 *Sema3A*-WT and *Sema3A*-cECKO pups into 500 µL of RA1 buffer and isolated the RNA according to the instructions of the Nucleospin RNA XS kit (Macherey-Nagel). The RNA was transcribed to cDNA using the High Capacity Reverse Transcription kit (Applied Biosystems). The PCR reactions were performed using FastStart SYBR green master mix (Roche) with a 7900HT Fast Real-Time PCR System (Applied Biosystems). The following primer sets were used: *Sema3A* Exon1 - Set 1 (middle) F: 5'-ACGTTAGTGTTGCCATGAGGT-3', R: 5'-AGGCAATCCCAGTGAACCAG-3'; *Sema3A* Exon1 - Set 2 (end) F: 5'-GCGGAGCGGAGATAAAAGGA-3', R: 5'-CCTCATGGCAACACTAACGTC-3'; house keeping gene *Rplp0* F: 5'-AGATTCTGGGATATGCTGTTGGC-3', R: 5'-TCGGGTCCTAGACCAGTGTTTC-3'.

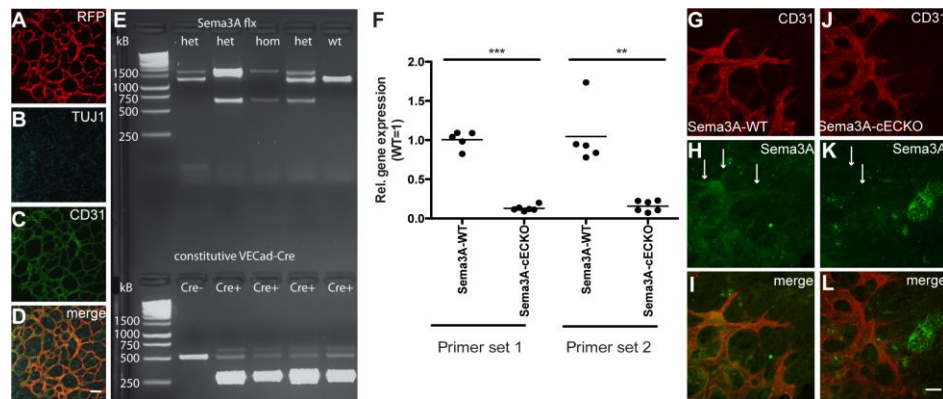

**Fig. S1. Confirmation of endothelial-cell specific *Sema3A* KO.** (A-D) Representative confocal images of a retinal whole mount of P7 constitutive VECad-Cre RFP pup stained for CD31 (green) and TUJ1 (cyan). (E) PCR analyses show amplicons for *Sema3A* *loxP* (1600 bp), *Sema3A* *wt* (1200 bp), and Cre-cut *Sema3A* *loxP* (650 bp). The Cre amplicon was present at 300 bp and the WT VECad amplicon at 550 bp. The Cre-cut amplicon was only present in Cre+ heterozygous or homozygous *Sema3A* *loxP* mice. (F) Quantification of relative *Sema3A* expression levels in *Sema3A*-cECKO pups compared to the *Sema3A*-WT littermates. A strong decrease in relative expression levels was detected with two different primer sets for *Sema3A* in *Sema3A*-cECKO compared to *Sema3A*-WT P8 pups: Primer set one: *Sema3A*-WT:  $1.01 \pm 0.11$ ,  $n=5$ , *Sema3A*-cECKO:  $0.13 \pm 0.04$ ,  $n=6$ ,  $t$ -test,  $p=1.97 \times 10^{-5}$ ; Primer set two: *Sema3A*-WT:  $1.05 \pm 0.39$ ,  $n=5$ , *Sema3A*-cECKO:  $0.16 \pm 0.07$ ,  $n=6$ ,  $t$ -test,  $p=6.43 \times 10^{-3}$ . (G-L) High-magnification confocal images of retinal whole mounts of P7 *Sema3A*-WT and *Sema3A*-cECKO pups stained for CD31 (red) and *Sema3A* (green, arrows). Reduced *Sema3A* staining was visible in tip cell regions of *Sema3A*-cECKO compared to *Sema3A*-WT retinas. Scale bars: (A-D)=50  $\mu\text{m}$ , (G-L)=20  $\mu\text{m}$ . \*\*= $p < 0.01$ , \*\*\*= $p < 0.001$ .

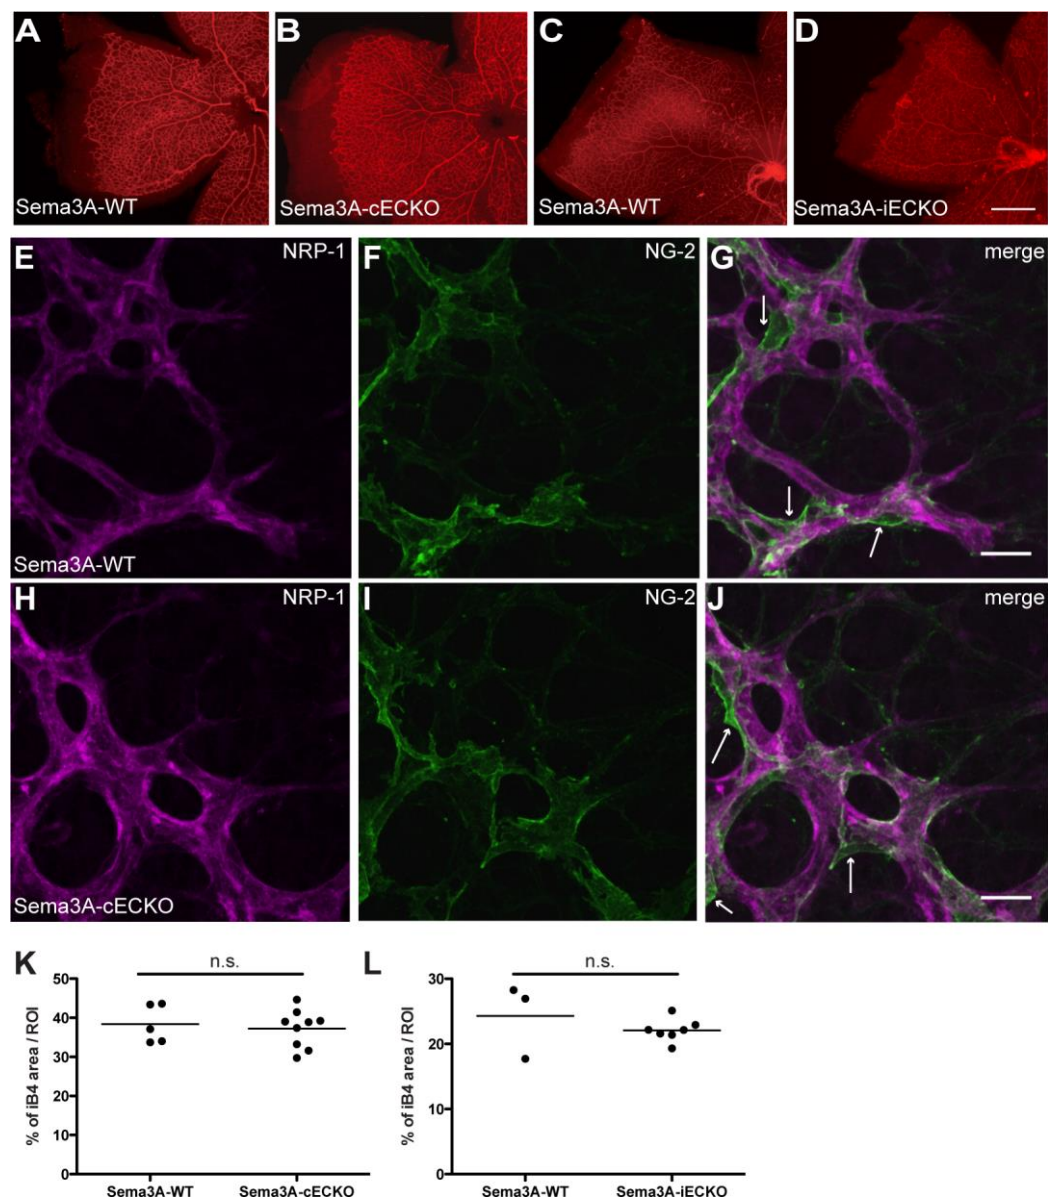

**Fig. S2. Endothelial cell-specific Sema3A KO does not alter BV density or pericyte coverage during development.** (A-D) IB4-stained P7 retinal whole mounts of Sema3A-WT, Sema3A-cECKO and Sema3A-iECKO pups. (E-J) High-magnification confocal images of retinal tip cells stained for Nrp-1 (magenta) and NG-2 (green) showed no overlap (arrows) and no gross alteration of pericyte coverage in P7 Sema3A-WT (A-C) or Sema3A-cECKO (D-F) pups. (K-L) Quantification of the IB4+ area per region of interest (%) in retinas of Sema3A-WT, Sema3A-cECKO and Sema3A-iECKO pups. No significant differences detectable. Scale bars: (A-D)=500  $\mu$ m, (E-K)=20  $\mu$ m.

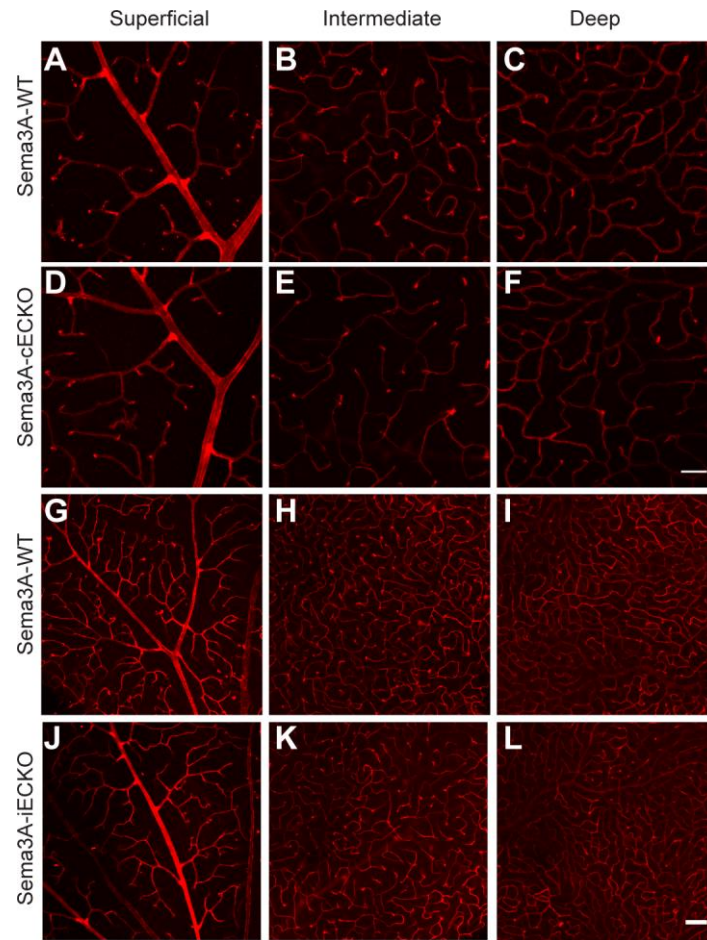

**Fig. S3. Endothelial cell-specific Sema3A KO does not change blood vessel density at later developmental stages.** (A-F) Confocal images of iB4 stained retinal whole mounts of 12 weeks old Sema3A-WT and Sema3A-cECKO mice. (G-L) Confocal images of iB4 stained retinal whole mounts of 3 weeks old control and Sema3A-iECKO mice. Scale bars: 50  $\mu$ m.
